# Supplementary material for: Enhanced histone H3 acetylation of the PD-L1 promoter via the COP1/c-Jun/HDAC3 axis is required for PD-L1 expression in drug-resistant cancer cells
Source: J Exp Clin Cancer Res. 2020 Feb 5;39:29. doi: 10.1186/s13046-020-1536-x (PMC7003365; doi:10.1186/s13046-020-1536-x)
Supplement: Supplementary file 1 — Additional file 1: Table S1. Clinical characteristics of the participating patients. Table S2. Primer sequences designed for qRT-PCR detection. Figure S1. IC50 value determination of parental and drug-resistant cancer cells for cisplatin and doxorubicin treatment. Figure S2. Identification of the potential regulators involved in PD-L1 expression in drug-resistant A549/CDDP and MCF-7/ADR cells. Figure S3. DNA methylation of the PD-L1 promoter is barely changed in drug-resistant A549/CDDP and MCF-7/ADR cells. Figure S4. The effects of HDAC inhibitors on PD-L1 expression in drug-sensitive A549, MCF-7 and HepG2 cells. Figure S5. Identification of E3 ligases involved in c-Jun expression in drug-resistant A549/CDDP, MCF-7/ADR and HepG2/ADR cells. [file 13046_2020_1536_MOESM1_ESM.docx]

**Enhanced histone H3 acetylation of the PD-L1 promoter** **via the COP1/c-Jun/HDAC3 axis is required for PD-L1 expression** **in drug-resistant cancer cells**

Haifang Wang1, 2, *, Chen Fu1, *, Jun Du2, Hongsheng Wang2, Rui He4, Xiaofeng Yin1, Haixia Li1, Xin Li1,Hongxia Wang1, Kui Li5, Lei Zheng1, ‡, Zongcai Liu3, ‡, YurongQiu1, 5, ‡

**Additional files**

**(Additional file 1: Tables S1-S2 and Figures S1-S5)**

**Table S1.** Clinical characteristics of the participating patients

|  | Cisplatin-sensitive NSCLC patients | Cisplatin-resistant NSCLC patients |
| --- | --- | --- |
| Cases (n) | 45 | 45 |
| Median age (Range) | 63 (43-77) | 67 (48-78) |
| Gender (%) |  |  |
| Male | 35 (78) | 38 (84) |
| Female | 10 (22) | 7 (16) |
| Tumor stage (%) |  |  |
| Stage I | 8 (18) | 6 (13) |
| Stage II | 15 (33) | 13 (29) |
| Stage III | 22 (49) | 26 (58) |
| Stage IV | 0 (0) | 0 (0) |
| Pathological classification (%) |  |  |
| Adenocarcinoma | 28 (62) | 24 (53) |
| Squamous cell carcinoma | 17 (38) | 21 (47) |
| Smoking status (%) |  |  |
| Never | 15 (33) | 10 (22) |
| Former or current | 30 (67) | 35 (78) |

**Table S2.** Primer sequences designed for qRT-PCR detection

|  | Forward primer (5' to 3') | Reverse primer (5' to 3') |
| --- | --- | --- |
| PD-L1 | TGGTGCCGACTACAAGCGAATTAC | TTGGAATTGGTGGTGGTGGTCTTAC |
| S6K | GGATTTCTGGGGAAGAGGTG | TTGGAAGTGGTGCCGATG |
| Stat1 | CACCAGAGCCAATGGAACTT | AGCCCACTATCCGAGACACC |
| Stat3 | ATTCGGAAAGTATTGTCGGC | TGCAGGTCGTTGGTGTCA |
| IRF1 | GATACAAAGCAGGGGAAAAGG | GAAGCATCCGGTACACTCG |
| c-Jun | AGCATGACCCTGAACCTGG | CCGTTGCTGGACTGGATT |
| c-Fos | TCCGAAGGGAAAGGAATAAG | GAGCTGCCAGGATGAACTCT |
| HDAC3 | CCTGGCATTGACCCATAGCC | CTCTTGGTGAAGCCTTGCATA |
| COP1 | TATGCCCCATCTGCTTTGATAT | TTGTCCTCCAAACTCTGATGAA |
| CUL4 | GACCTCACAGTGAACATACTCA | TAGTTTGCCACTGAAGTTTTCG |
| FBW7 | GTCTGAGAACATTAGTGGGACA | ACTTTGAGTGTCCGATCTGTAG |
| ITCH | GCAGCAGTTTAACCAGAGATTC | GTGTGTTGTGGTTGACGAAATA |
| MEKK1 | CTAGAACCTTCAGACCCAATGT | GAGCTACGCCTACTGTGATATT |
| SAG | AACAATCGCTGCCCTCTCT | CTCATTTGCCGATTCTTTGGA |
| GAPDH | GCACCGTCAAGGCTGAGAAC | TGGTGAAGACGCCAGTGGA |


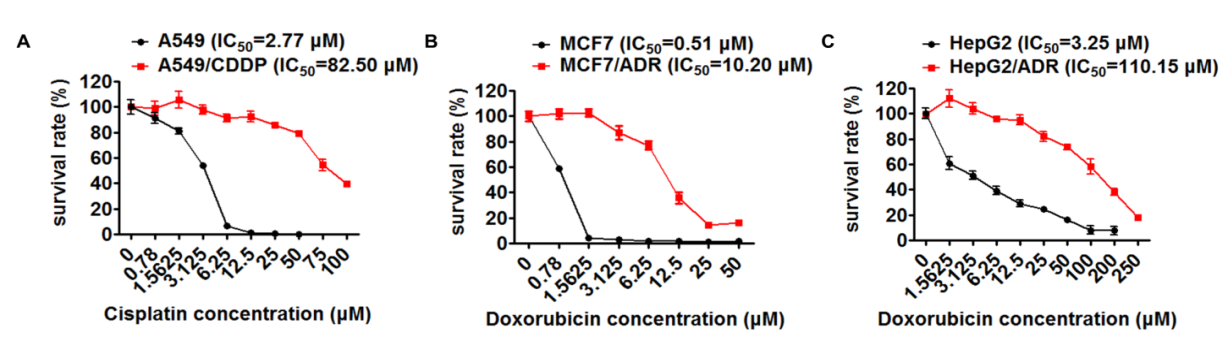


**Figure S1.** IC50 valuedetermination of parental and drug-resistant cancer cells for cisplatin and doxorubicin treatment. Drug-sensitive and drug-resistant cancer cells were treated with increasing doses of cisplatin or doxorubicin for 48 h, and cell viability was detected by MTT assay. (A: A549 and A549/CDDP cells, 0 ~ 100 μM cisplatin; B: MCF7 and MCF7/ADR cells, 0 ~ 50 μM doxorubicin; C: HepG2 and HepG2/ADR cells, 0 ~ 250 μM doxorubicin) Next, according to the cell viability detection data, IC50 values of the cancer cells for cisplatin and doxorubicin treatment were calculated. All experiments were performed independently in triplicate.


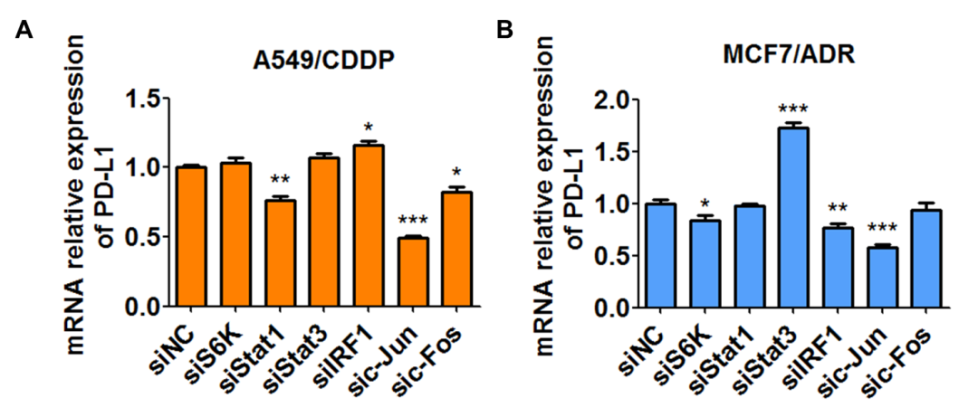


**Figure S2.** Identification of the potential regulators involved in PD-L1 expression in drug-resistant A549/CDDP and MCF-7/ADR cells. Drug-resistant A549/CDDP (A) and MCF7/ADR (B) cells were transfected with siRNAs targeting S6K, Stat1, Stat3, IRF1, c-Jun, and c-Fos or negative control siRNA (siNC) for 24 h, and PD-L1 mRNA expression was detected by qRT-PCR analysis. All experiments were performed independently in triplicate. *P ≤ 0.05, **P ≤ 0.01, ***P ≤ 0.001.


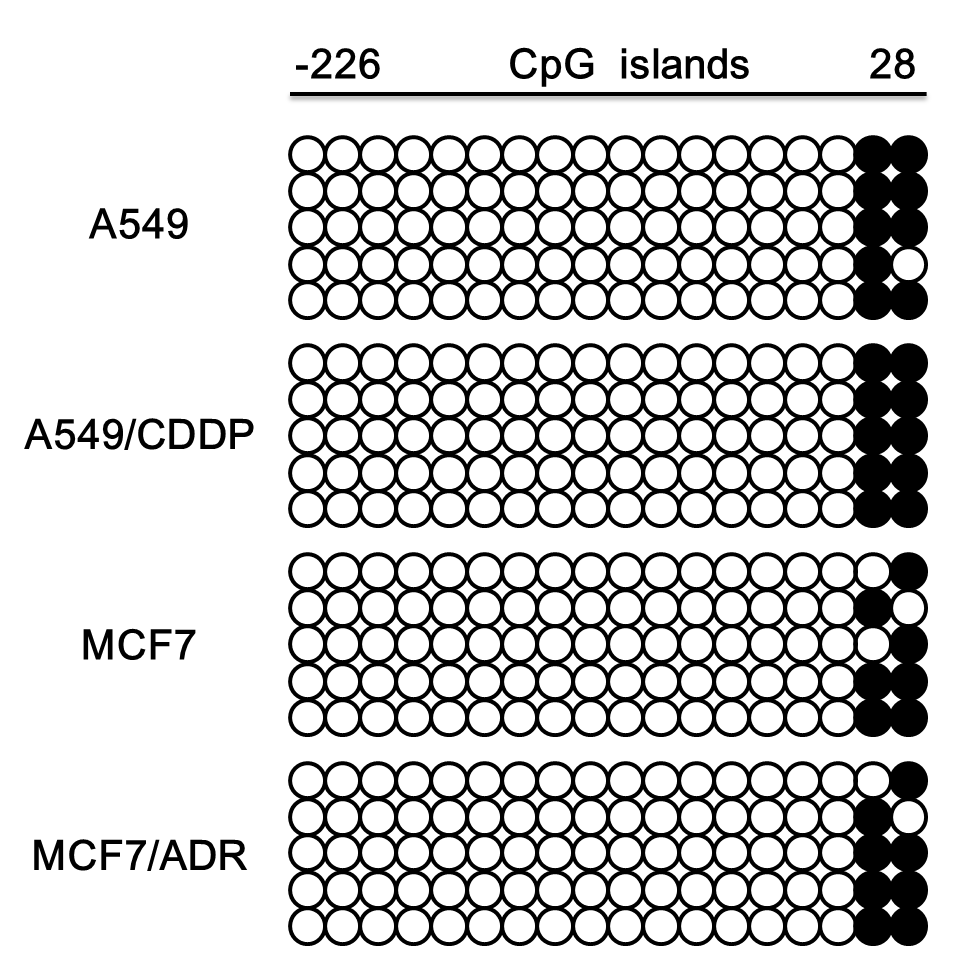


**Figure S3.** DNA methylation of the PD-L1 promoter is barely changed in drug-resistant A549/CDDP and MCF-7/ADR cells. To detect the DNA methylation of the PD-L1 promoter in A549, A549/CDDP, MCF7 and MCF7/ADR cells, genomic DNA was prepared using a TIANamp Genomic DNA kit (Tiangen, Beijing, China), followed by treatment with sodium bisulfite from an Epitect Bisulfite DNA kit (QIAGEN, Germany). Bisulfite-specific primers were designed with Methyl Primer Express software (Applied Biosystems, CA) and used to amplify the promoter region of the PD-L1 gene for both the sense and antisense strands. The sequences of the primers were as follows: forward 5’-GAA AAT TGG ATT GAT ATG TTT TA-3’ and reverse 5’-ACR AAA CCT CRA AAA ACT-3’ (R=A/G). Each dot represents a CpG site. The white dots represent unmethylated CpG dinucleotides, whereas the black dots represent methylated CpG dinucleotides in cytosine residues.


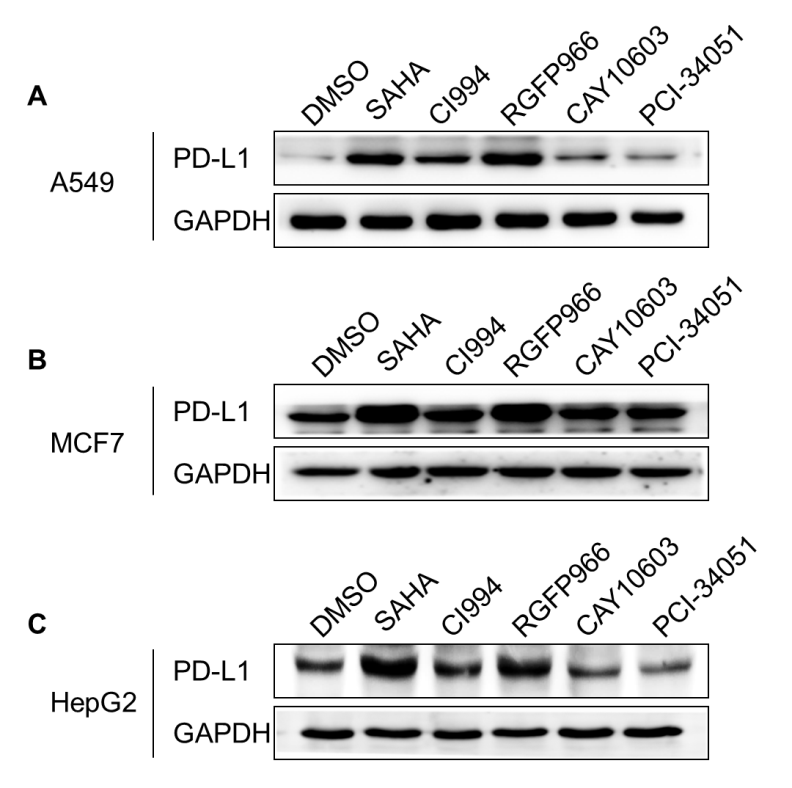


**Figure S4.** The effects of HDAC inhibitors on PD-L1 expression in drug-sensitive A549, MCF-7 and HepG2 cells. A549 (A), MCF7 (B), and HepG2 (C) cells were treated with a pan-HDAC inhibitor (SAHA, 2 μM), HDAC1-specific inhibitor (CI994, 2 μM), HDAC3-specific inhibitor (RGFP966, 2 μM), HDAC6-specific inhibitor (CAY10603, 2 μM), HDAC8-specific inhibitor (PCI-34051, 2 μM), or solvent DMSO for 48 h, and PD-L1 protein expression was detected by western blotting.


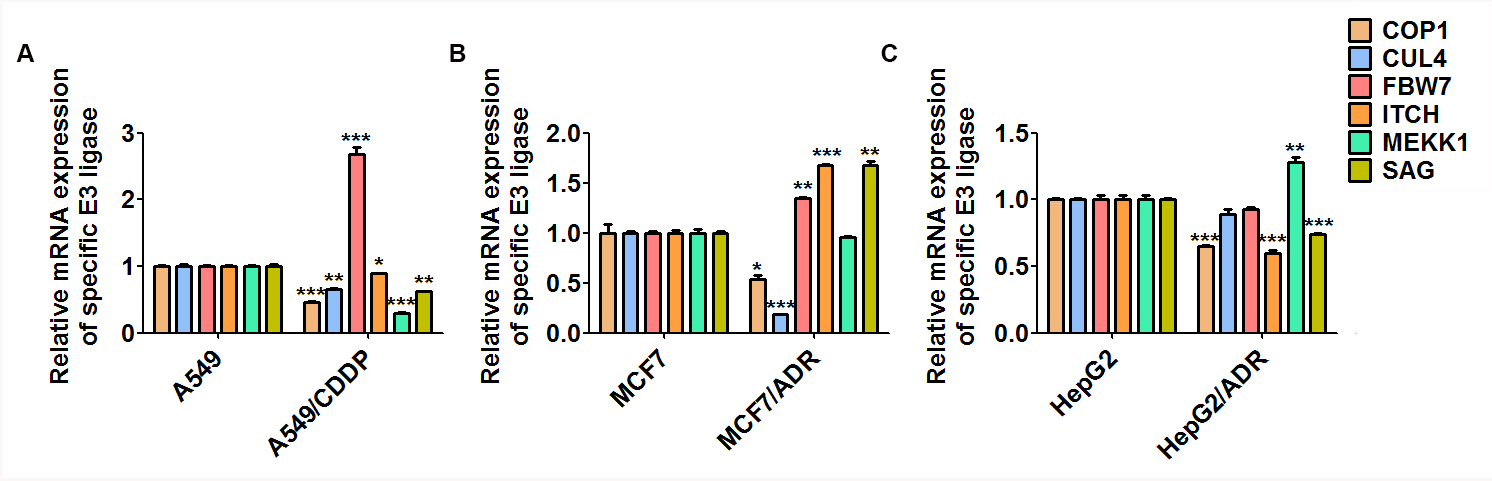


**Figure S5.** Identification of E3 ligases involved in c-Jun expression in drug-resistant A549/CDDP, MCF-7/ADR and HepG2/ADR cells. Drug-sensitive and resistant cancer cells were collected, and E3 ligases, including COP1, CUL4, FBW7, ITCH, MEKK1, and SAG, were detected by qRT-PCR (A: A549 and A549/CDDP cells; B: MCF7 and MCF7/ADR cells; C: HepG2 and HepG2/ADR cells). All experiments were performed independently in triplicate. *P ≤ 0.05, **P ≤ 0.01, ***P ≤ 0.001.
